# Supplementary material for: N-glycosylation of the human β1,4-galactosyltransferase 4 is crucial for its activity and Golgi localization
Source: PubMed Central journal article supplement (PMC7501111; doi:10.1007/s10719-020-09941-z), 2020-08-22

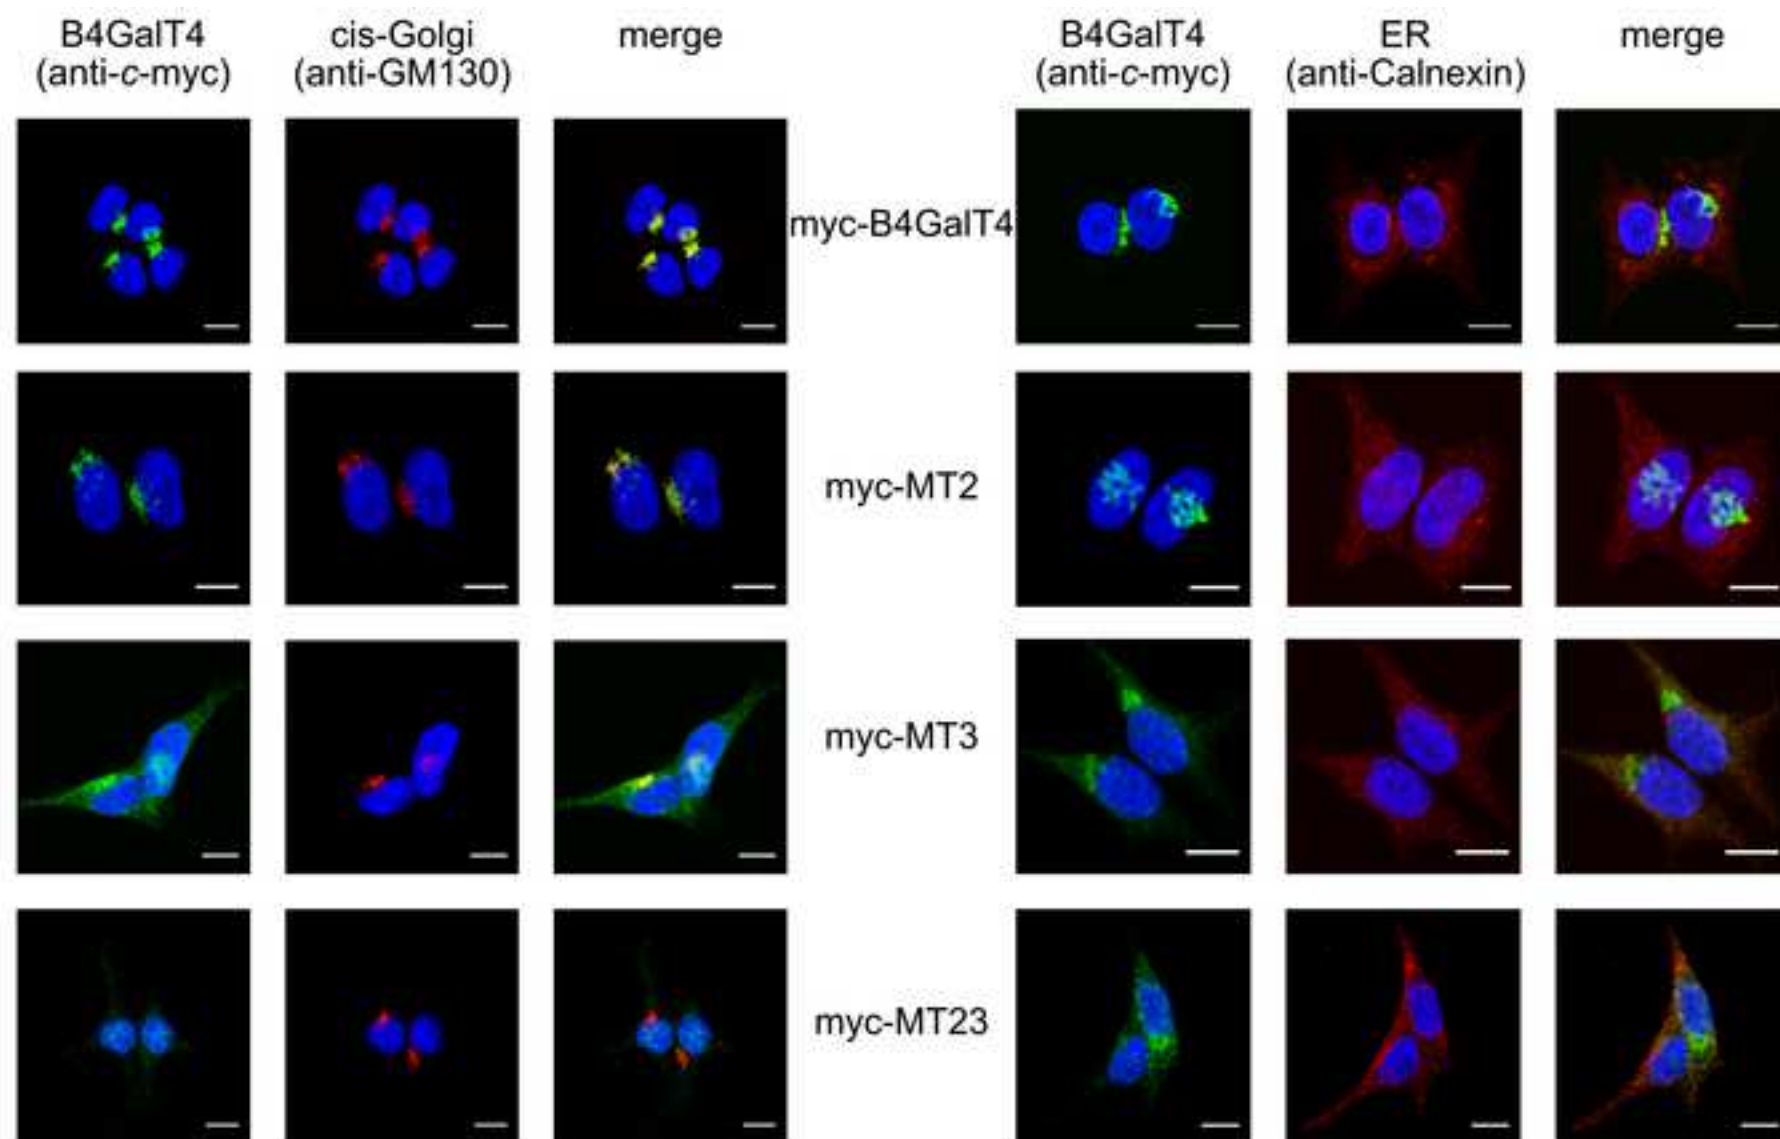

a

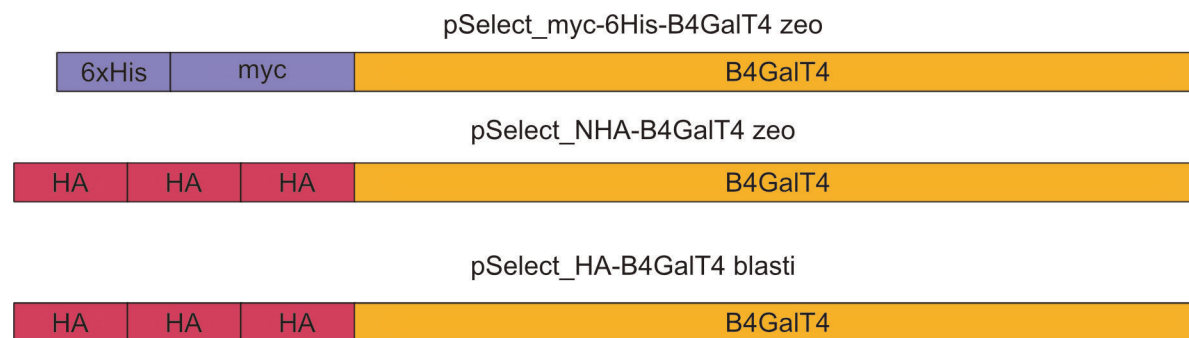

b

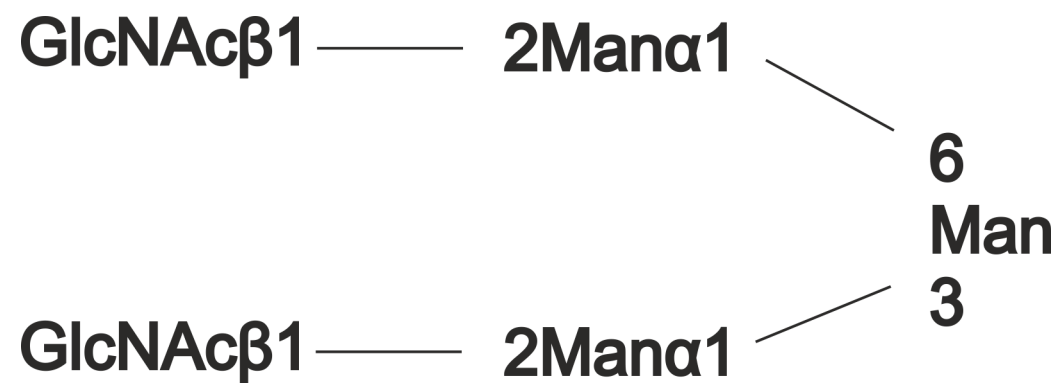

# C

Alignment of *B4GalT4* CDS regions targeted for creation of gene A375 knock-out cell lines

|                      |                                                              |     |
|----------------------|--------------------------------------------------------------|-----|
| B4GalT4 (bp281-454)  | CAGATCTCACTTTGGAAGAGGTACAGGCAGAAAATCCCAAAGTGTCCAGAGGCCGGTATC | 60  |
| A14.9-2_pJET1.2-for  | CAGATCTCACTTTGGAAGAGGTACAGGCAGAAAATCCCAAAGTGTCCAGAGGCCGGTATC | 60  |
| A14.9-6_pJET1.2-for  | CAGATCTCACTTTGGAAGAGGTACAGGCAGAAAATCCCAAAGTGTCCAGAGGCCGGTATC | 60  |
| A14.9-8_pJET1.-2-for | CAGATCTCACTTTGGAAGAGGTACAGGCAGAAAATCCCAAAGTGTCCAGAGGCCGGTATC | 60  |
|                      |                                                              |     |
| B4GalT4 (bp281-454)  | GCCCTCAGGAATGTAAAGCTTTACAGAGGGTCGCCATCCTCGTTCCCCACCGGAACAGAG | 120 |
| A14.9-2_pJET1.2-for  | GCCCTCAGGAATGTAAAGCTTTACAGAGGGTCGCCATCCTCGTTCCCCACCGGAACAGAG | 120 |
| A14.9-6_pJET1.2-for  | GCCCTGAGGAATGTAAAGCTTTACAGAGGGTCGCCATCCTCGTTCCCCACCGGAACAGAG | 120 |
| A14.9-8_pJET1.-2-for | GCCCTCAGGAATGTAAAGCTTTACAGAGGGTCGCCATCCTCGTTCCCCACCGGAACAGAG | 120 |
|                      |                                                              |     |
| B4GalT4 (bp281-454)  | AGAAACACCT-----                                              | 130 |
| A14.9-2_pJET1.2-for  | AGAAACATCAGTCCCCACCGGAACAGAGAGA-----                         | 151 |
| A14.9-6_pJET1.2-for  | AGAAACACCTGATGTACCGTCCCCACCGGAACAGAGAGAAACACCTGATGTACCCCCAC  | 180 |
| A14.9-8_pJET1.-2-for | AGAAACACCTGATGTACCCCCACCGGAAC-----                           | 150 |
|                      |                                                              |     |
| B4GalT4 (bp281-454)  | -----GATGTACCTGCTGGAACATCTGCATCCCTTCCTGCA                    | 166 |
| A14.9-2_pJET1.2-for  | -----AACACCTGATGTACCTGCTGGAACATCTGCATCCCTTCCTGCA             | 194 |
| A14.9-6_pJET1.2-for  | CGGAACAGAGAGAAACACCTGATGTACCTGCTGGAACATCTGCATCCCTTCCTGCA     | 236 |
| A14.9-8_pJET1.-2-for | -----AGAGTACCTGCTGGAACATCTGCATCCCTTCCTGCA                    | 186 |

Alignment of *B4GalT4* CDS regions targeted for creation of gene HEK293T knock-out cell lines

|                       |                                                              |     |
|-----------------------|--------------------------------------------------------------|-----|
| B4GalT4 (bp1-140)     | ATGGGCTTCAACCTGACTTTCCACCTTCTACAAATTCCGATTACTGTTGCTGTTGACT   | 60  |
| H1.2.2-4_pJET1.2-for  | ATGGGCTTCAACCTGACTTTCCACCTTCC-----TAC                        | 33  |
| H1.2.-2-5_pJET1.2-for | ATGGGCTTCAACCTGACTTTCCACCTTCTACAAATTCCGATTACTGTT-----        | 50  |
| H1.2.2-6_pJET1.2-for  | ATGGGCTTCAACCTGACTTTCCACCTTCTACAAATTC-----                   | 39  |
|                       |                                                              |     |
| B4GalT4 (bp1-140)     | TTGTGCCTGACAGTGGTTGGGTGGGCCACCAGTAACTACTTCGTGGGTGCCATTCAAGAG | 120 |
| H1.2.2-4_pJET1.2-for  | ATTGCTGTTGACGTGGTTGGGTGGGCCACCAGTAACTACTTCGTGGGTGCCATTCAAGAG | 93  |
| H1.2.-2-5_pJET1.2-for | -----GCTGACAGTGGTTGGGTGGGCCACCAGTAACTACTTCGTGGGTGCCATTCAAGAG | 105 |
| H1.2.2-6_pJET1.2-for  | -----CGATTAAGTGGTTGGGTGGGCCACCAGTAACTACTTCGTGGGTGCCATTCAAGAG | 94  |
|                       |                                                              |     |
| B4GalT4 (bp1-140)     | ATTCCTAAAGCAAAGGAGT                                          | 139 |
| H1.2.2-4_pJET1.2-for  | ATTCCTAAAGCAAAGGAGT                                          | 112 |
| H1.2.-2-5_pJET1.2-for | ATTCCTAAAGCAAAGGAGT                                          | 124 |
| H1.2.2-6_pJET1.2-for  | ATTCCTAAAGCAAAGGAGT                                          | 113 |

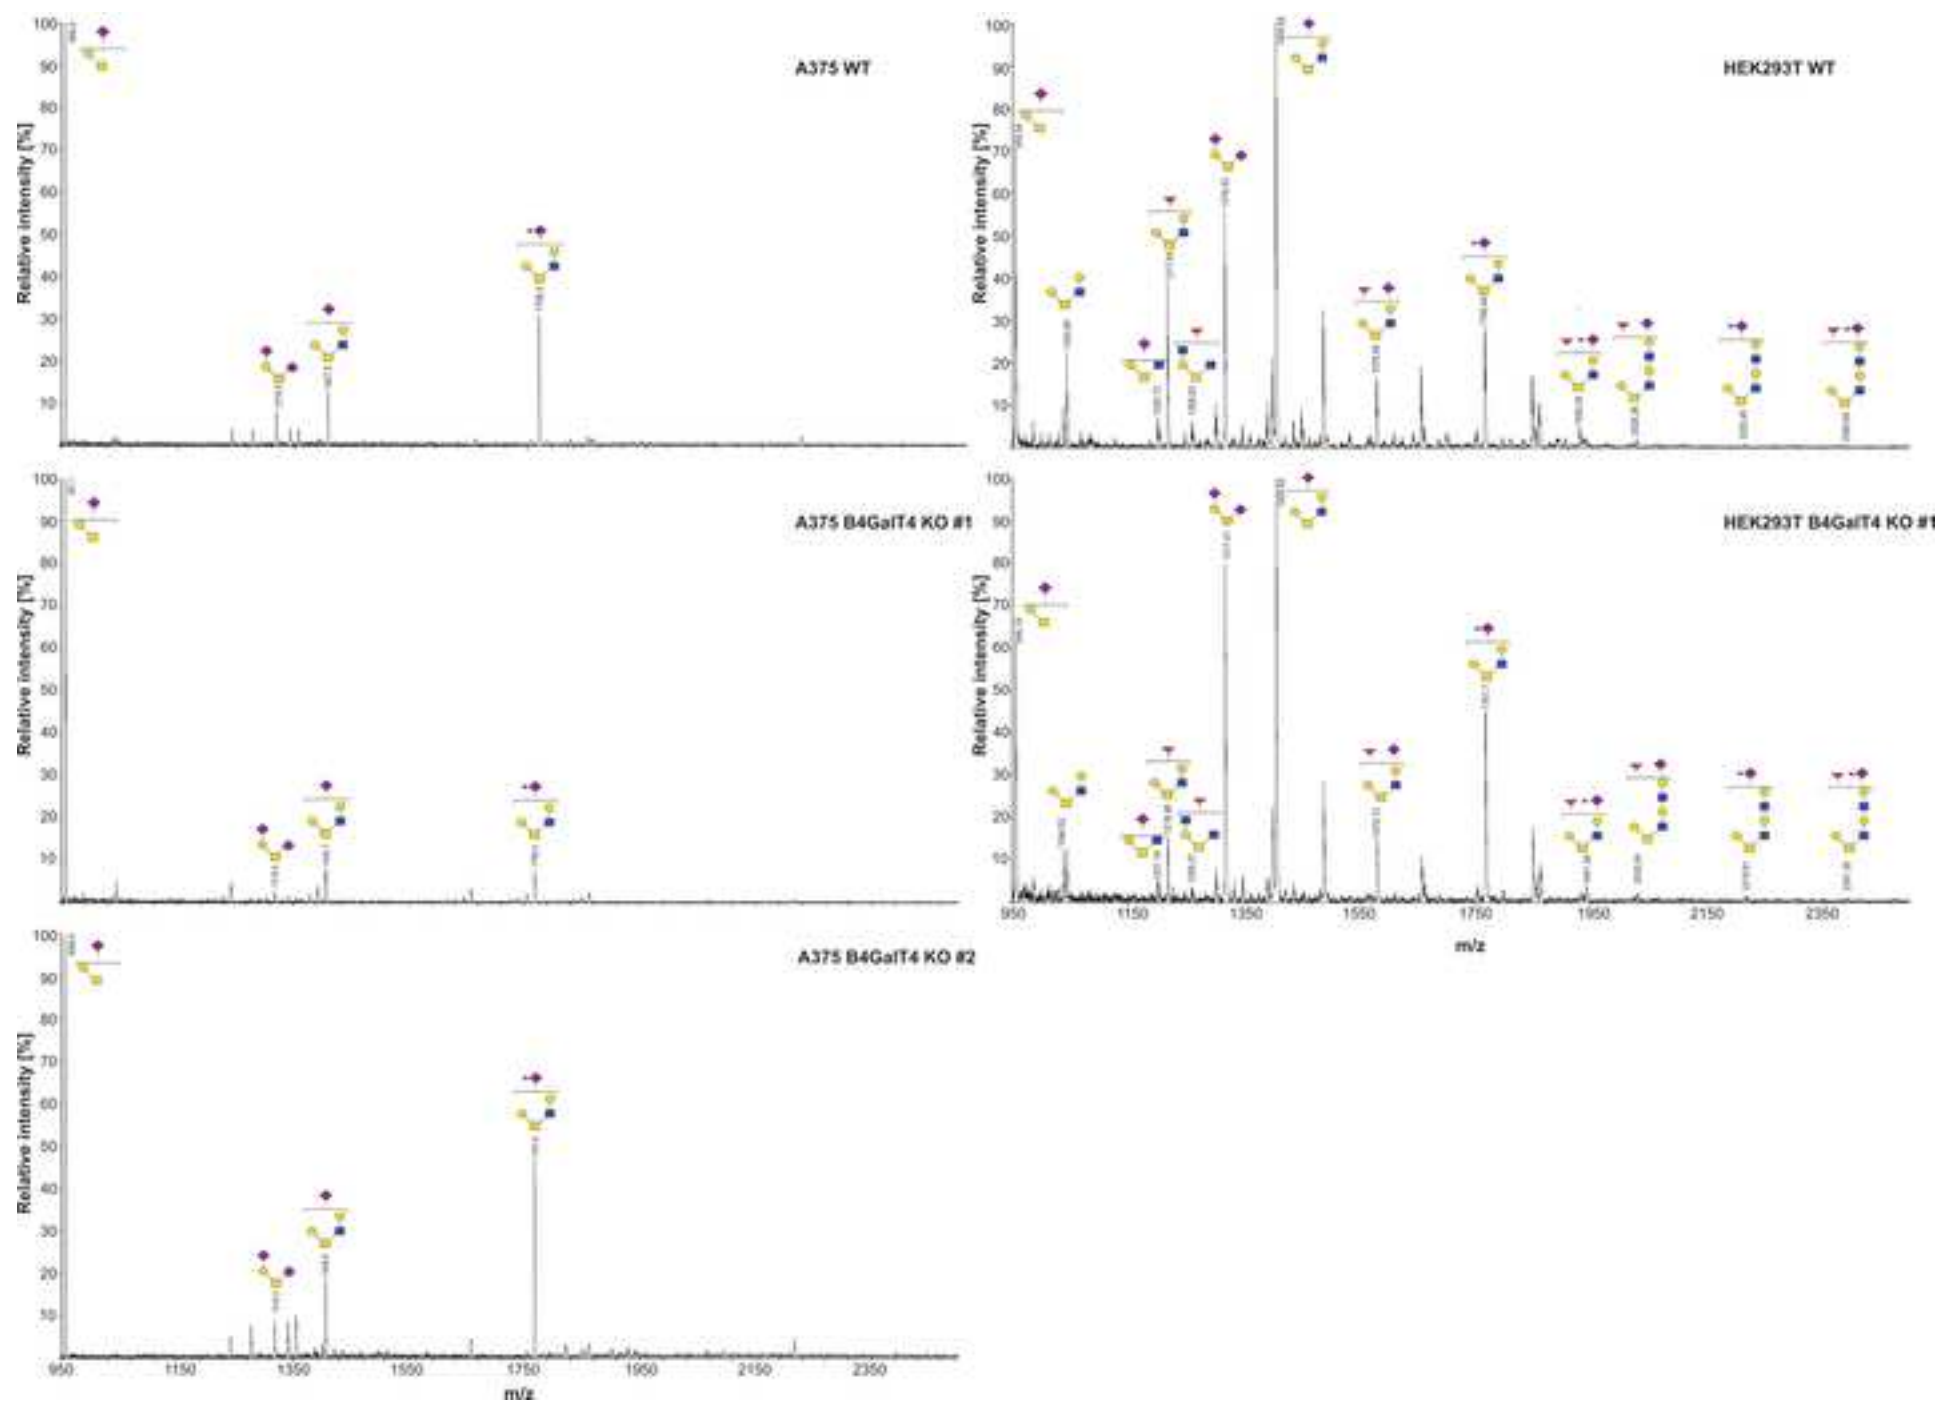

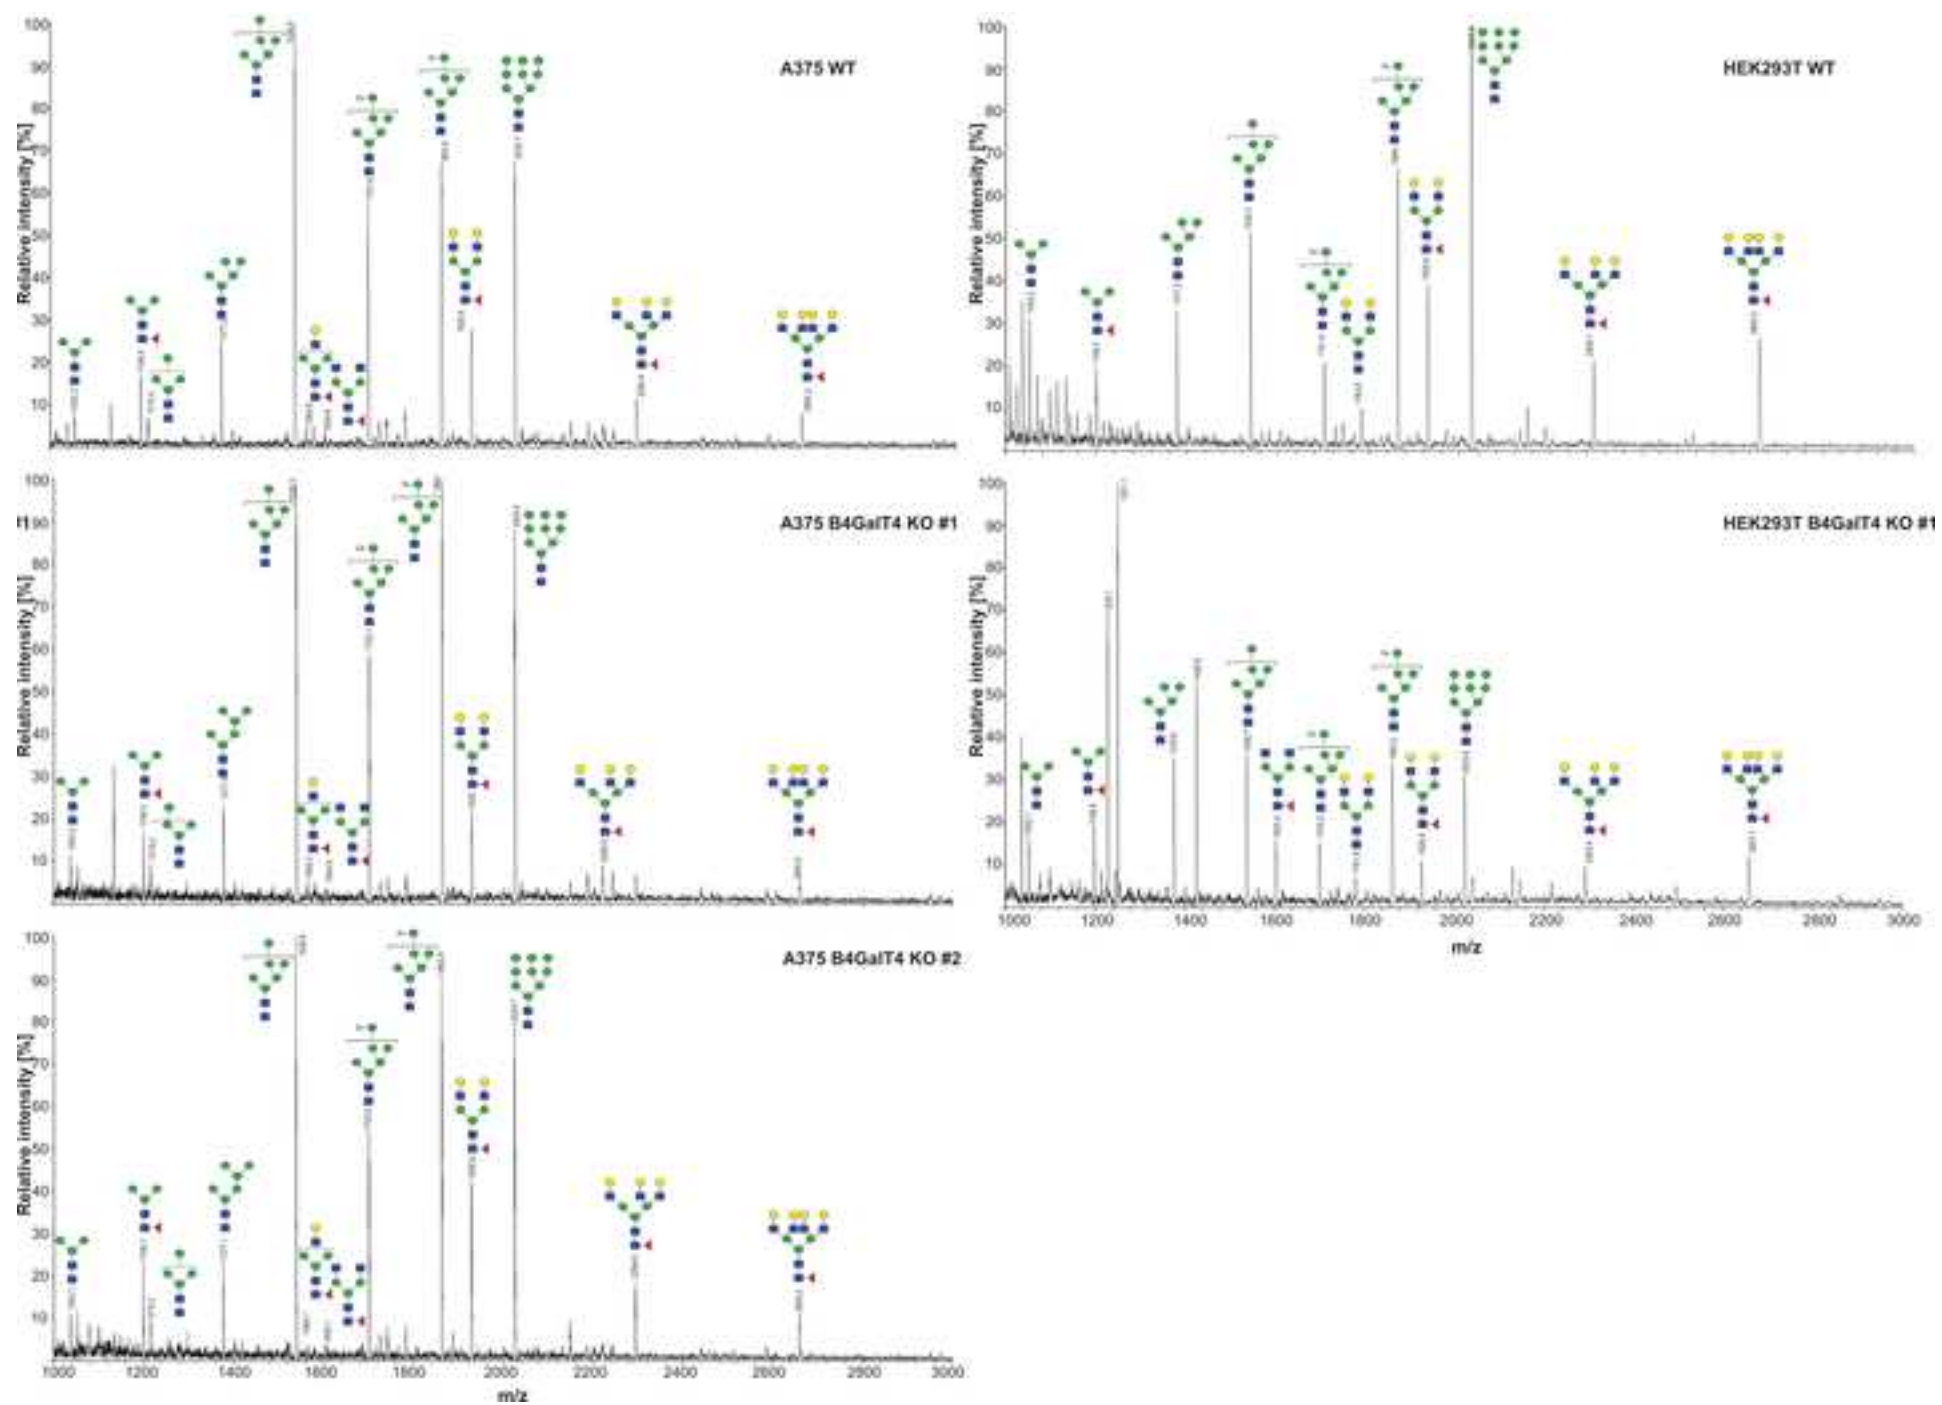

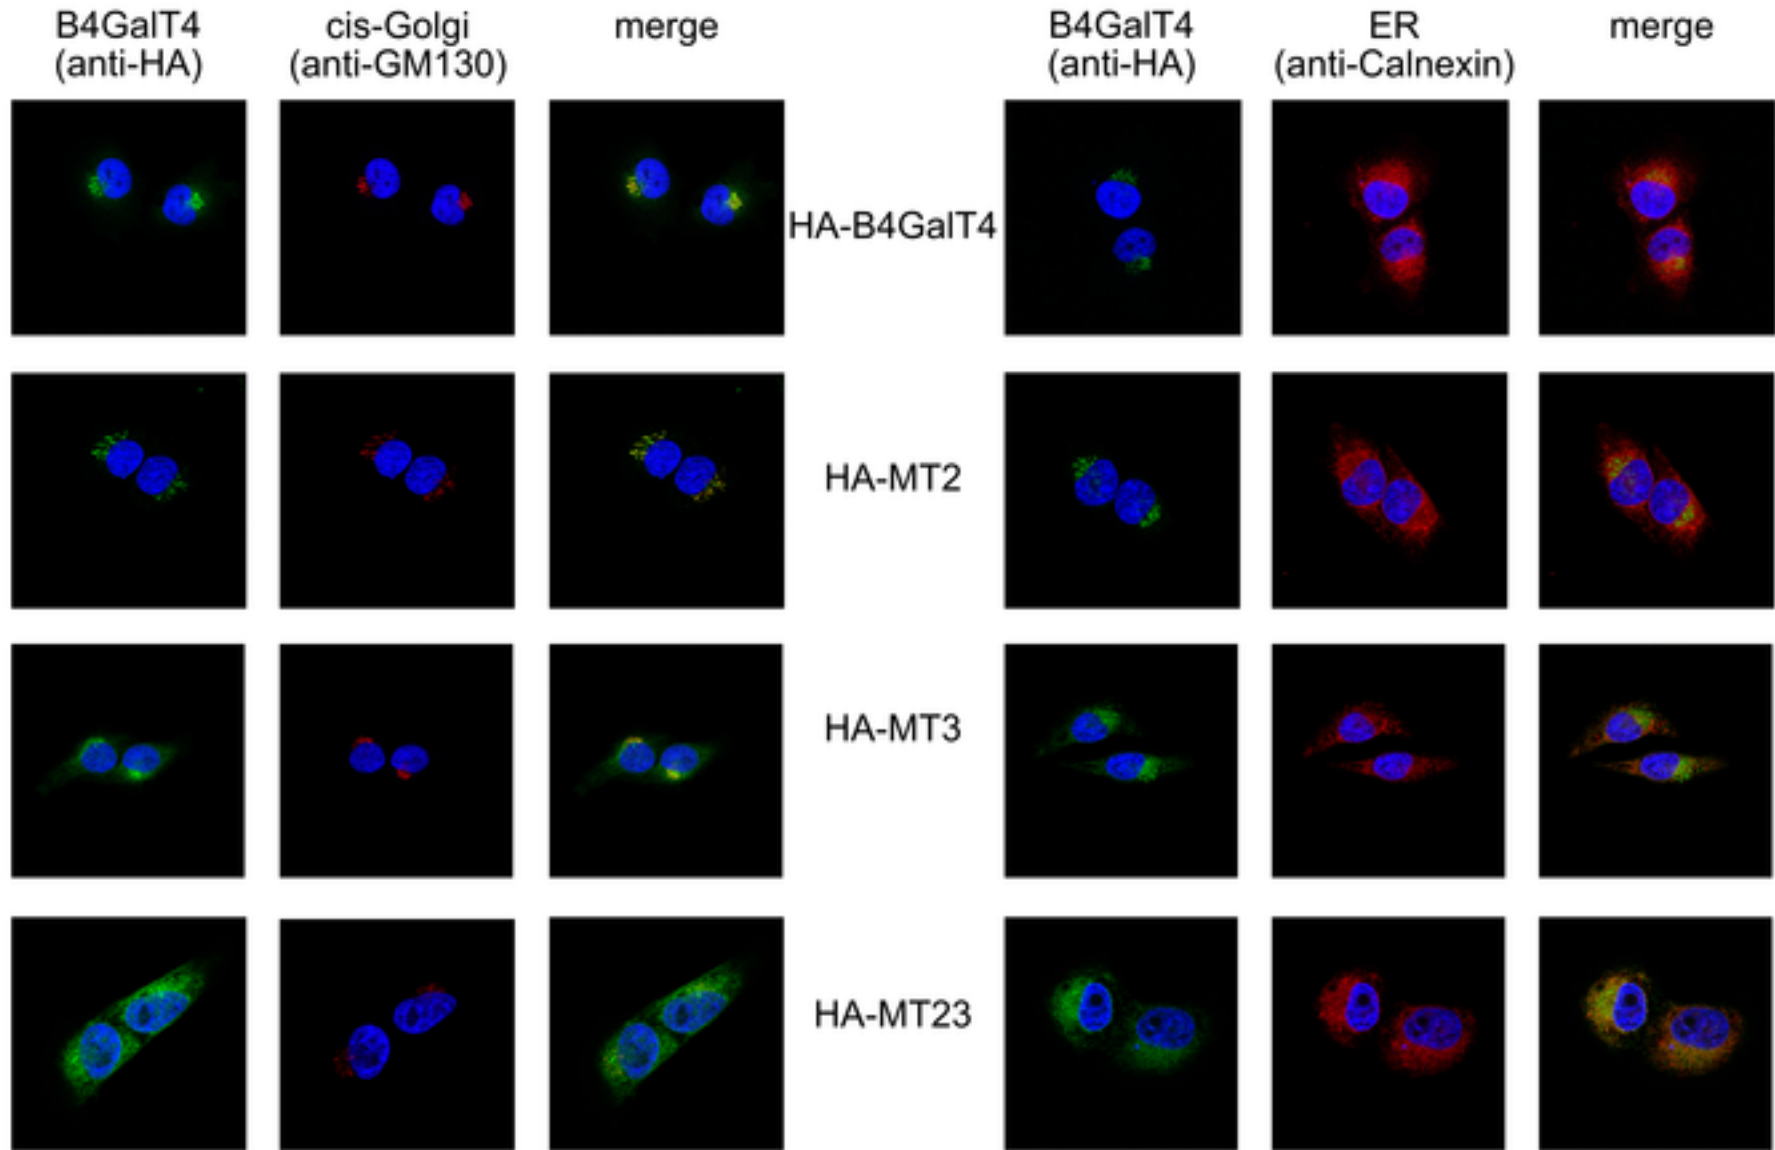

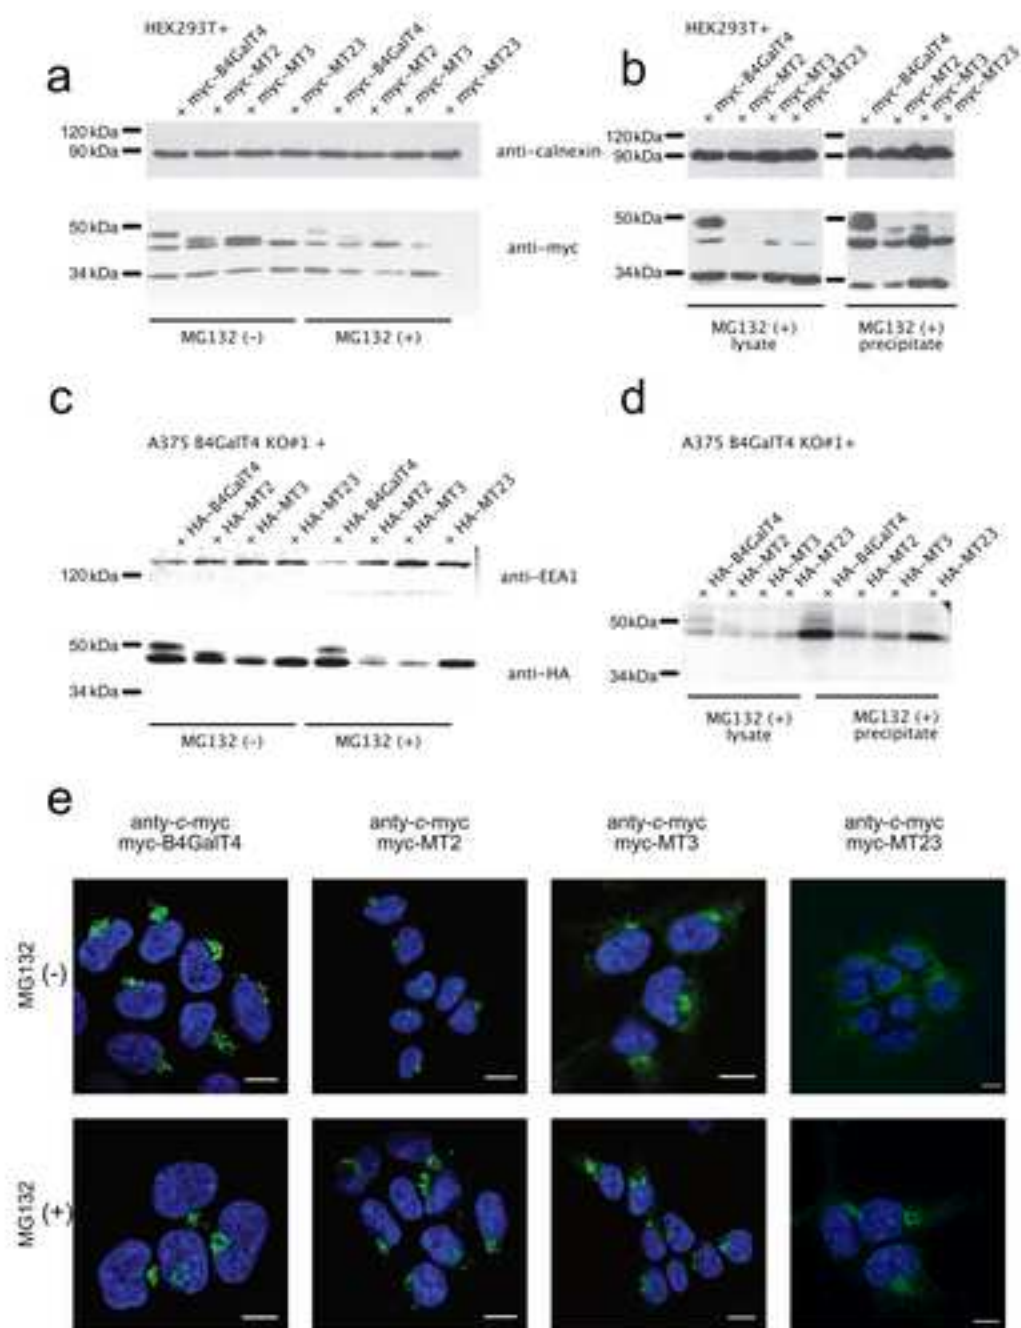

Supplement: 10719_2020_9941_MOESM2_ESM.pdf [file 10719_2020_9941_MOESM2_ESM.pdf]
